# Supplementary figures and images for: Studies of North Carolina marine algae XV. DNA sequencing reveals some different Ulva species compared to historical reports and U. carsoniae sp. nov. (Ulvales, Chlorophyta)
Source: publisher site journal article supplement (doi:10.1515/bot-2025-0011), 2025-07-07

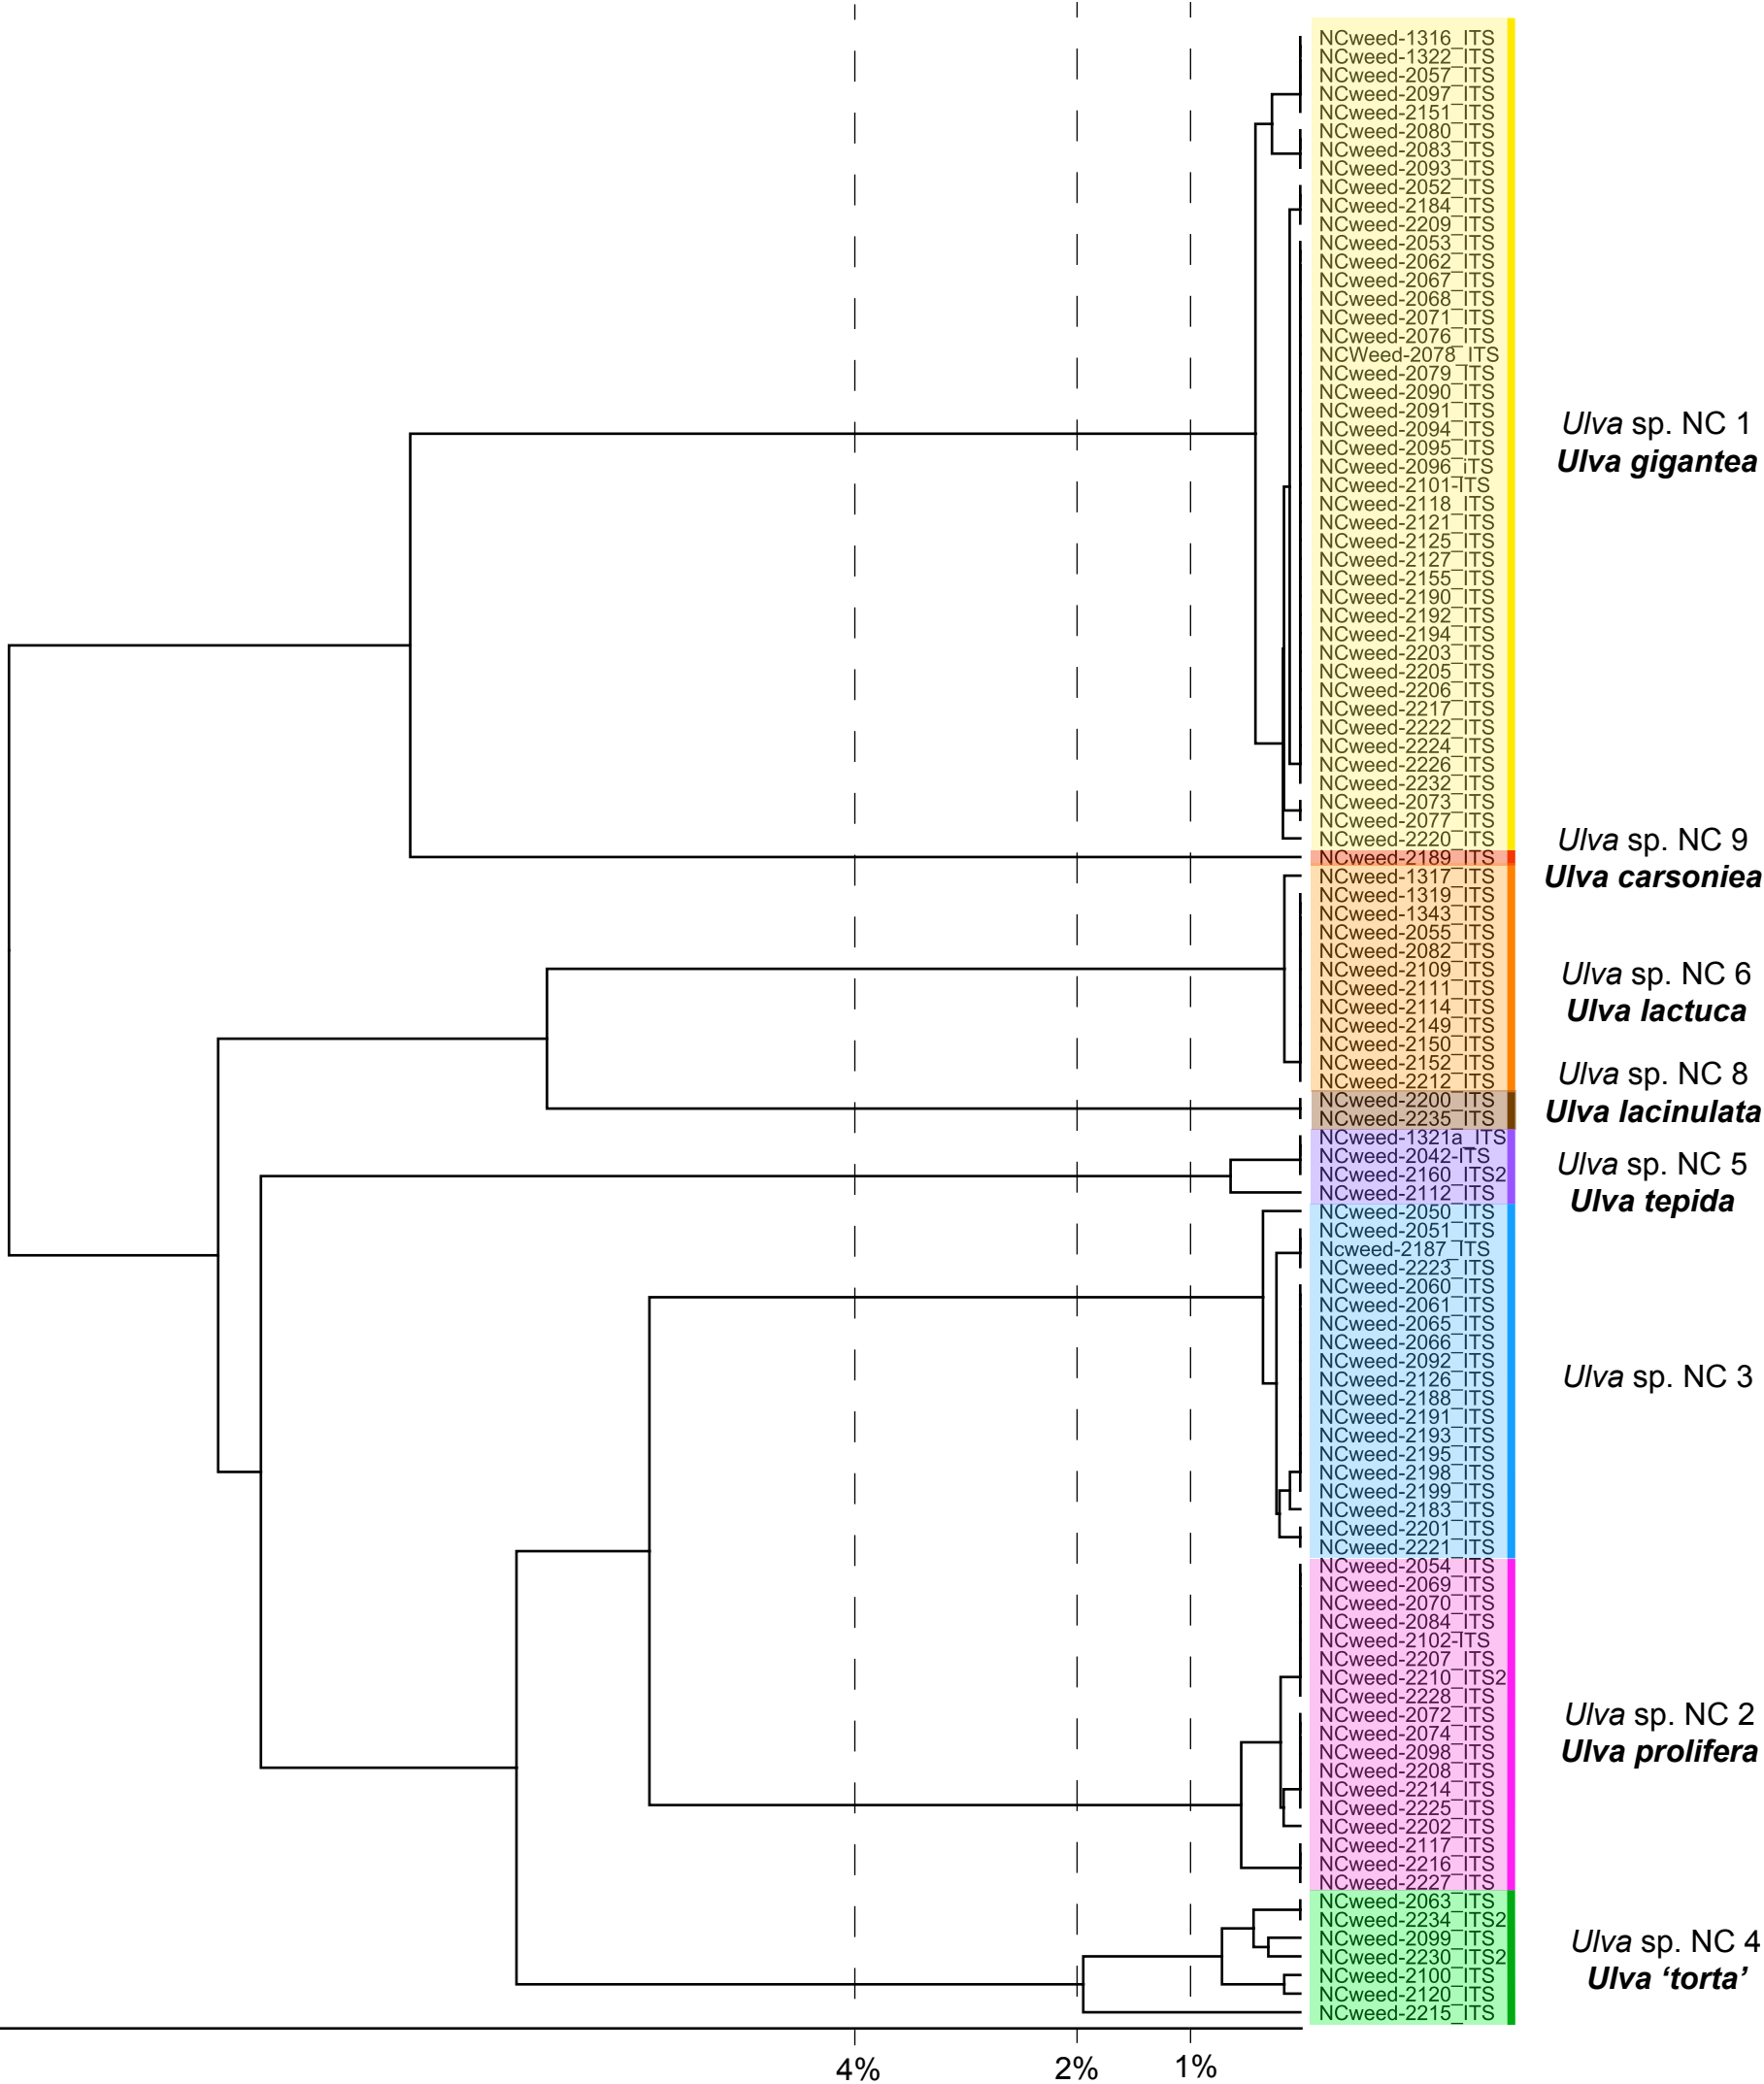

Supplement: Supplementary file 1 [file j_bot-2025-0011_suppl_002.pdf]
